# Supplementary material
Source: Research Square preprint supplement (doi:10.21203/rs.3.rs-8280286/v1)
Supplement: Supplementary file 1 [file 9aaf61d7430c83f4472f6e12.docx]

**
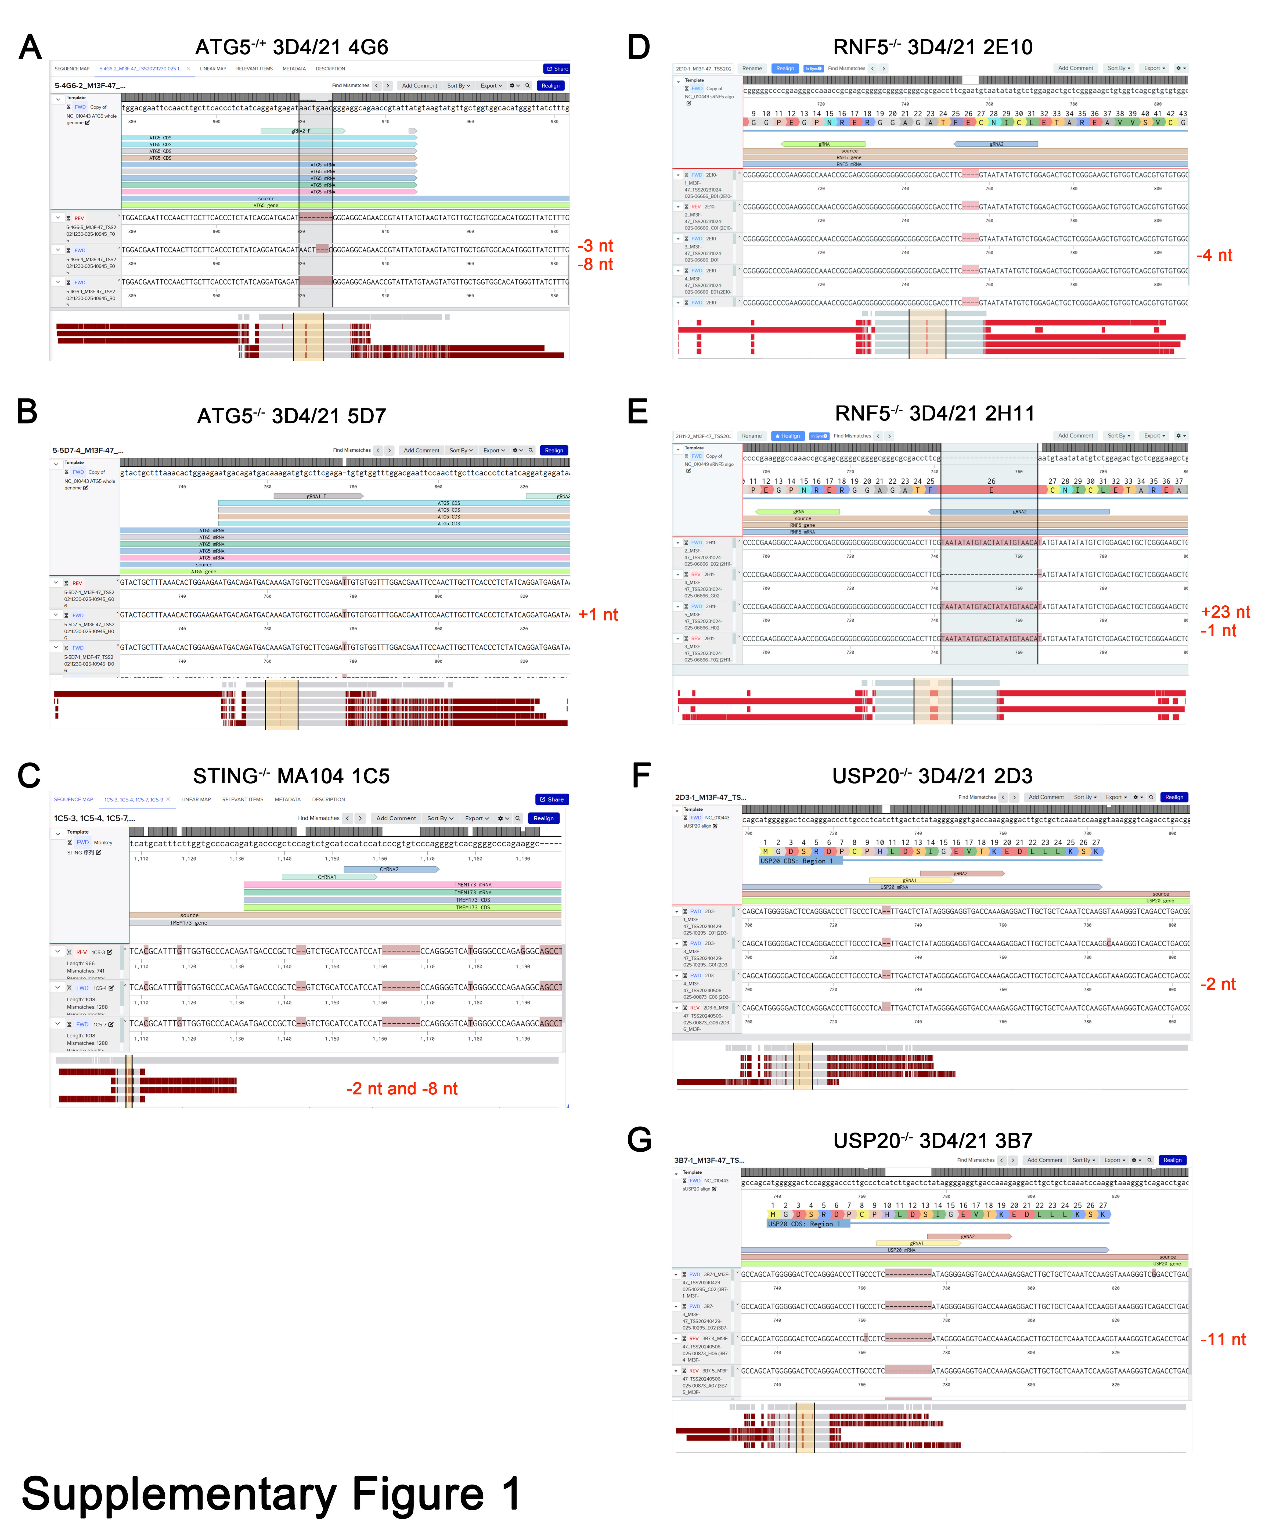
**

**Figure S1**. **The genomic DNA sequence editing in porcine knockout cell clones.**

The PCR products from pATG5 (**A** and **B**), moSTING (**C**) pRNF5 (**D** and **E**), pUSP20 (**F** and **G**) in knockout 3D4/21 or MA104 cell clones were ligated into T vectors and the multiple cloned sequences were aligned with the corresponding genome DNA templates for analysis of base insertion/deletion (ins/del) mutations. For each cell clones, four to five typical sequences were shown for alignment, with the base ins (+) and del (-) indicated on the right. All clones presented are the cell lines used in this study.


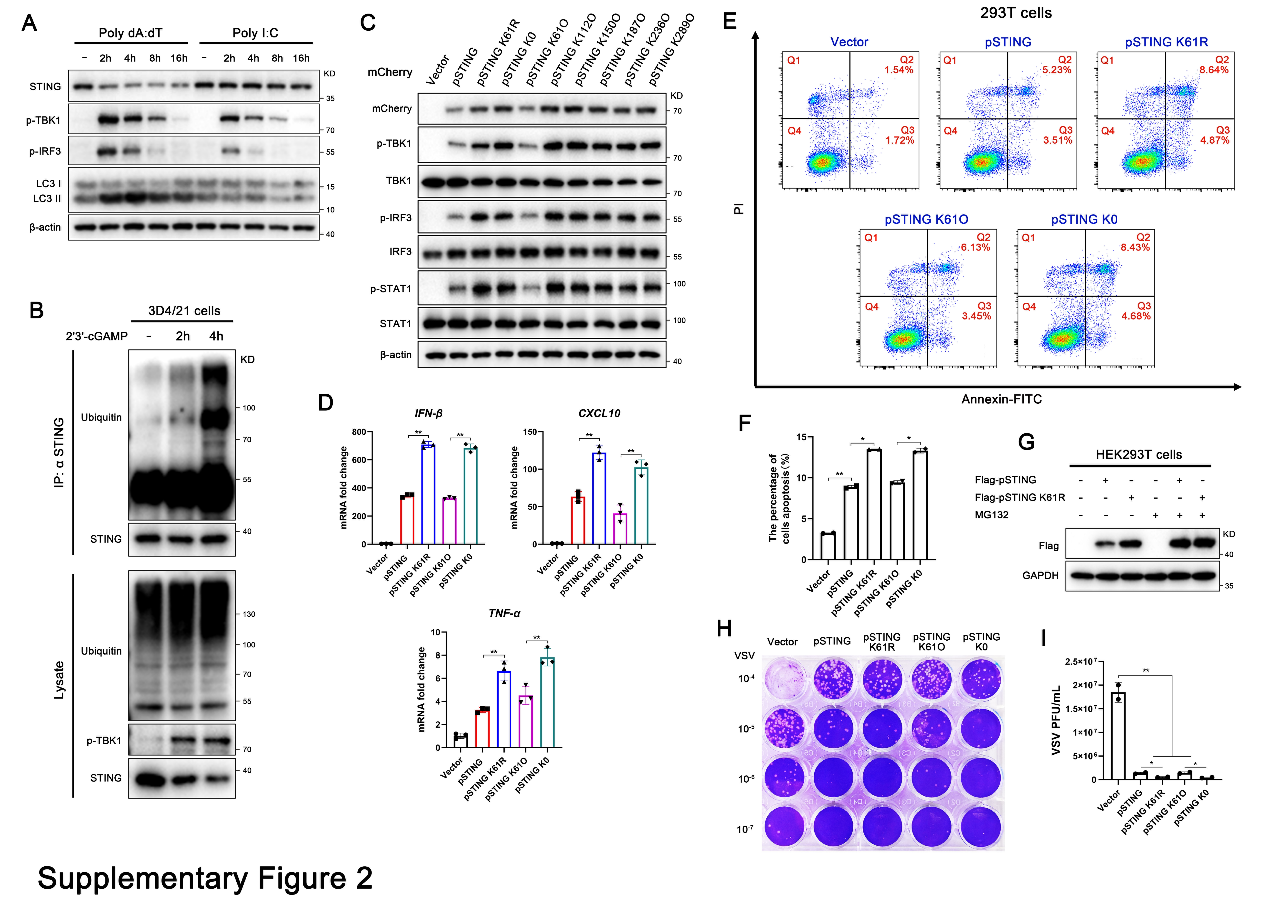


**Figure S2**. **Lysine 61 is essential for multiple signaling mediated by porcine STING** **(correlated with Figure 1 and Figure 2).**

**(A)** 3D4/21 cells were stimulated by poly dA:dT (2 μg/mL) or poly I:C (2 μg/mL) for the indicated times, followed by Western blotting. **(B)** 3D4/21 cells were transfected with 2’3’-cGAMP (2 μg/mL) for indicated times, and then cells were treated by MG132 (10 μM) for 6 h. After cell collection, STING was immunoprecipitated, and its ubiquitination level was determined by Western blotting. **(C-F)** HEK293T cells were transfected with pmCherry-C1, mCherry-pSTING or its mutants (1 μg) for 24 h (C and D) and 36 h (E and F). Cells were harvested and analyzed by Western blotting (C), RT-qPCR (D) and flow cytometry (E and F). **(G)** Western blot analysis of the differential effects of MG132 (10 μM) on the expression of Flag-tagged STING and its K61R mutant in HEK293T cells. **(H** and **I)** STING-/-3D4/21 cells were transfected with Flag-pSTING or its mutants (1 μg), and then stimulated with 2’3’-cGAMP (2 μg/mL) for 2 h, followed by VSV infection (MOI = 0.001, 12 h), and the viral titers of the supernatants from infected cells were measured by plaque assay **p* < 0.05 and ***p* < 0.01.


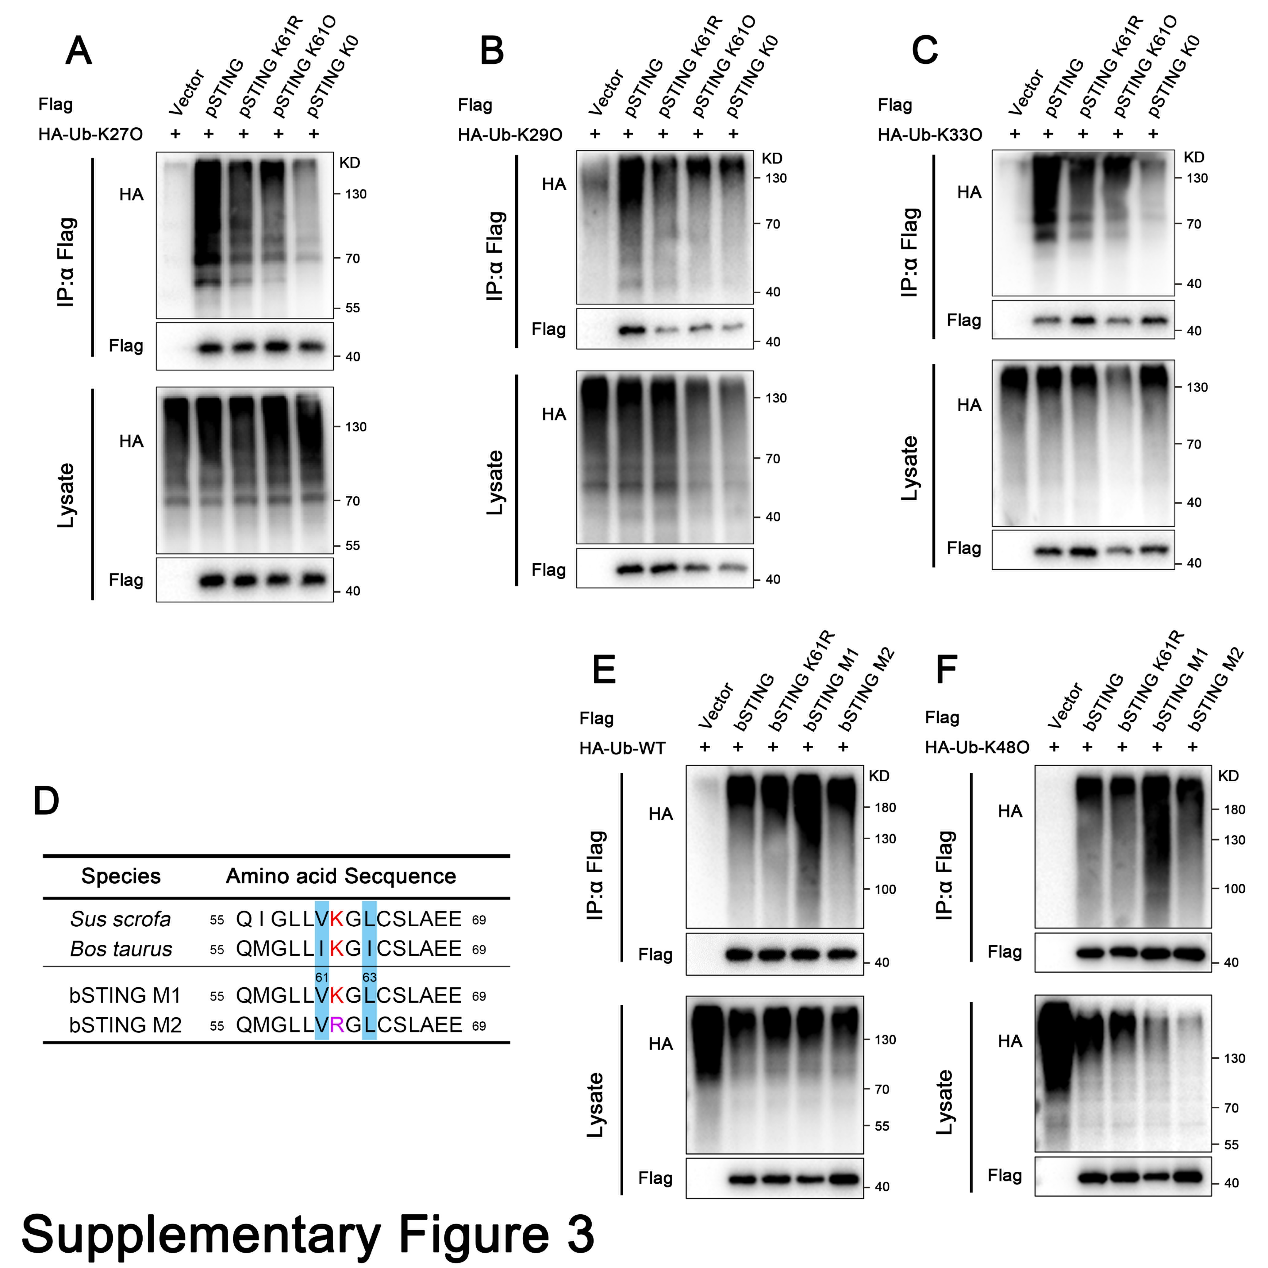


**Figure S3**. **Lysine 61 of pSTING is one of the sites for K27-, K29-, and K33-linked polyubiquitination (correlated with Figure 3 and Figure 4).**

**(A-C)** HEK293T cells in 6-well were co-transfected withFlag-pSTING or its mutants and HA-Ub-K27O (A), HA-Ub-K29O (B) or HA-Ub-K33O (C), plus its mutants (each 0.5 μg) for 24 h, and then cell were treated by MG132 (10 μM) for 6 h. STING was immunoprecipitated, and its ubiquitination level was determined by Western blotting. **(D)** Amino acid differences between bovine STING and porcine STING are indicated (marked with blue shades), and the sequences of bovine STING substitution mutations are shown. **(E** and **F)** HEK293T cells in 6-well were co-transfected withFlag-tagged bovine (b) STING or its mutants and HA-Ub-WT (E) or HA-Ub-K48O (each 0.5 μg) (F) for 24 h, and then cells were treated by MG132 (10 μM) for 6 h. After cell collection, STING was immunoprecipitated, and its ubiquitination level was determined by Western blotting.


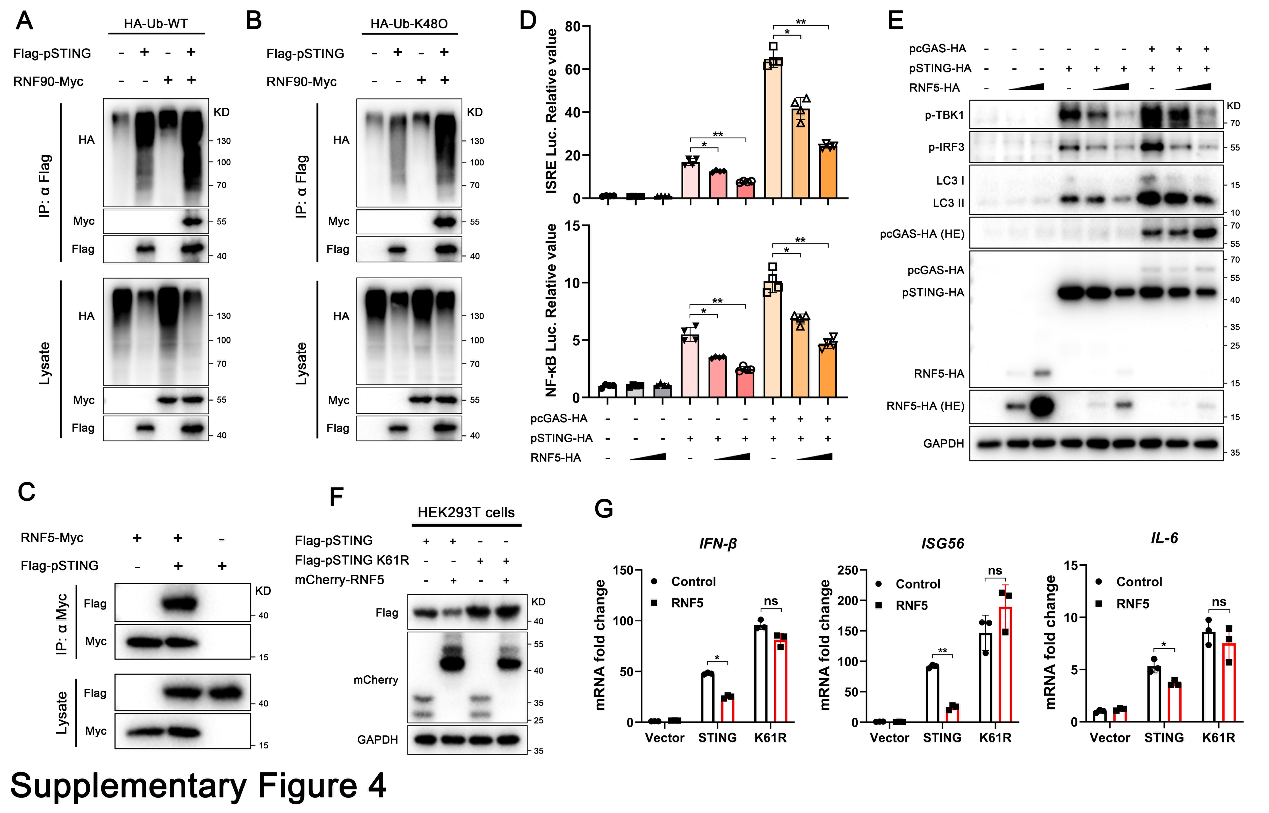


**Figure S4**. **RNF5 acts as an E3 ubiquitin ligase regulating pSTING-mediated signaling (correlated with Figure 5).**

**(A** and **B)** The effect of RNF90 on the total ubiquitination (A) and K48-linked ubiquitination (B) of pSTING was analyzed by Western blotting in 293T cells. (**C**)Co-immunoprecipitation analysis of interaction betweenRNF5-Myc and Flag-pSTING in transfected 293T cells (each 0.5 μg for transfected). **(D** and **E)** Luciferase assay (D) and Western blotting (E) were used to detect the effects of different doses of RNF5 (0, 200, 400 ng) on STING-activated ISRE promoter activity and the expression of specified proteins in HEK293T cells. (**F and G**) Western blotting and qRT-PCR were used to detect the effect of RNF5 on the protein expression (F) and downstream mRNA transcription (G) of pSTING and its K61R mutant in transfected HEK293T cells. **p* < 0.05 and ***p* < 0.01.


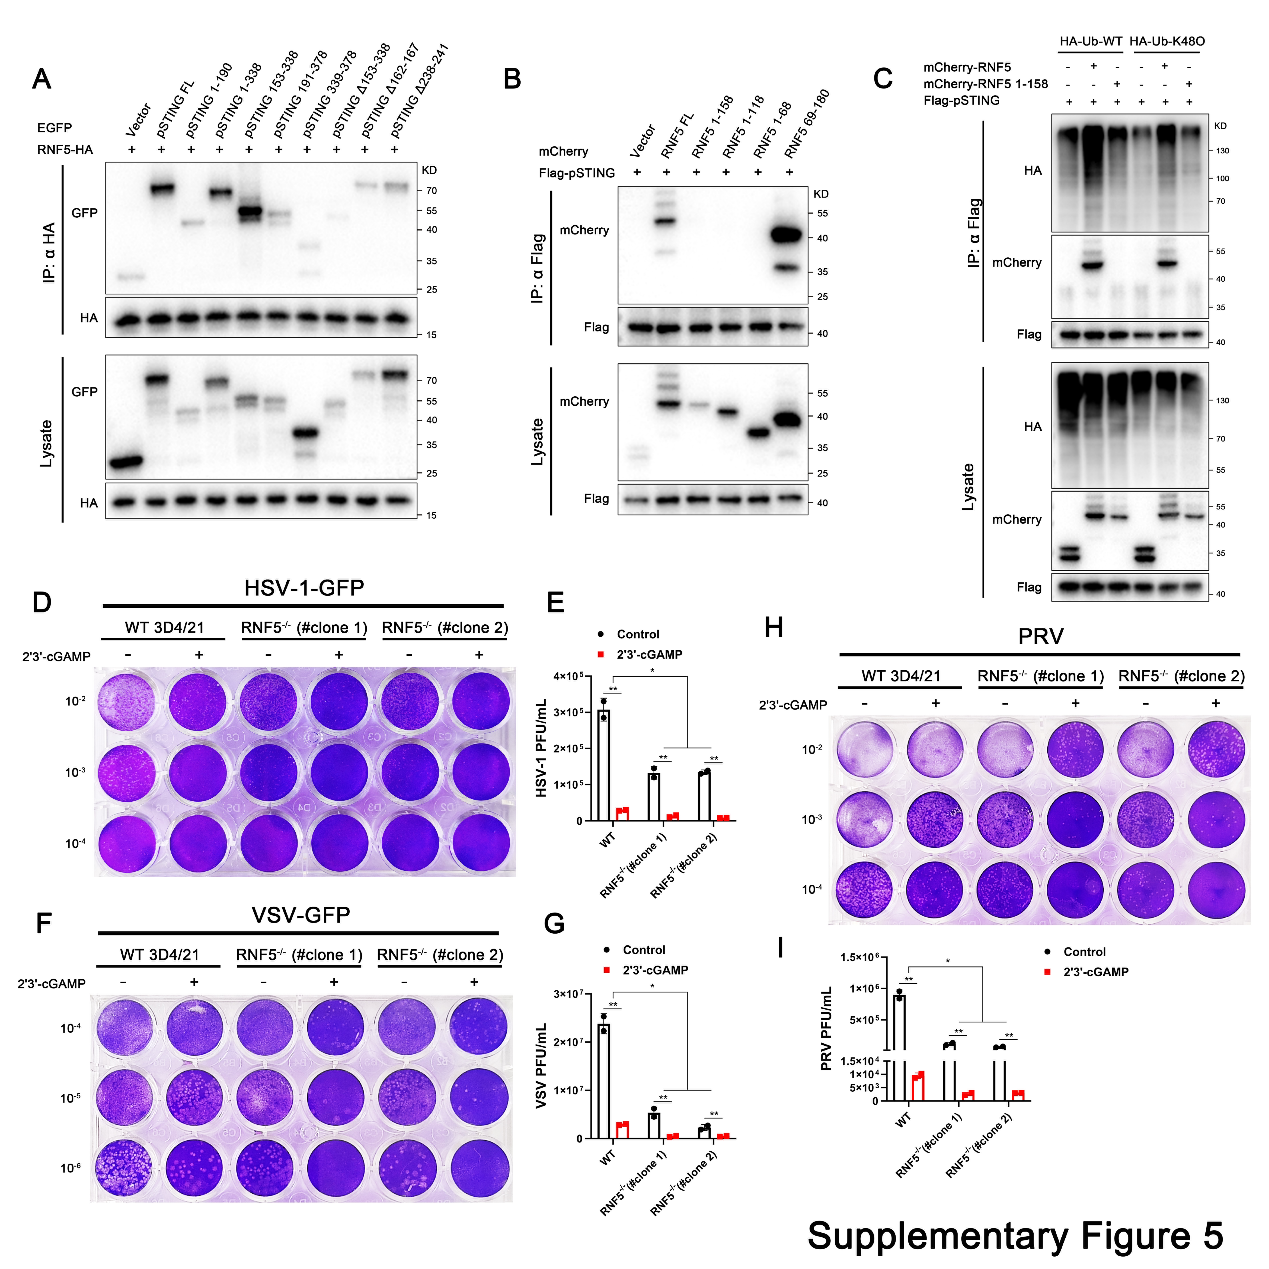


**Figure S5**. **RNF5 modulates pSTING's antiviral signaling via a direct interaction (correlated with Figure 7).**

**(A)** Co-immunoprecipitation analysis of the interaction between pSTING domains and RNF5 in HEK293T cells co-transfected with EGFP-STING mutants and RNF5-HA. **(B)** Co-immunoprecipitation analysis of the interaction between RNF5 domains and pSTING in HEK293T cells co-transfected with mCherry-RNF5 mutants and pSTING-Flag. **(C)** The effects of RNF5 and the RNF5 ΔTM2 mutant on the level of K48-linked ubiquitination of STING were determined by Western blotting. **(D-I)** RNF5-/- and WT 3D4/21 cells were stimulated by 2’3’-cGAMP (1 μg/mL) for 4 h. and then infected with HSV-1 (MOI = 0.01, 36 h) (D and E), VSV (MOI = 0.001, 12 h) (F and G) or PRV (MOI=0.01, 24 h) (H and I). Viral titers were measured by plaque assay. **p* < 0.05 and ***p* < 0.01.


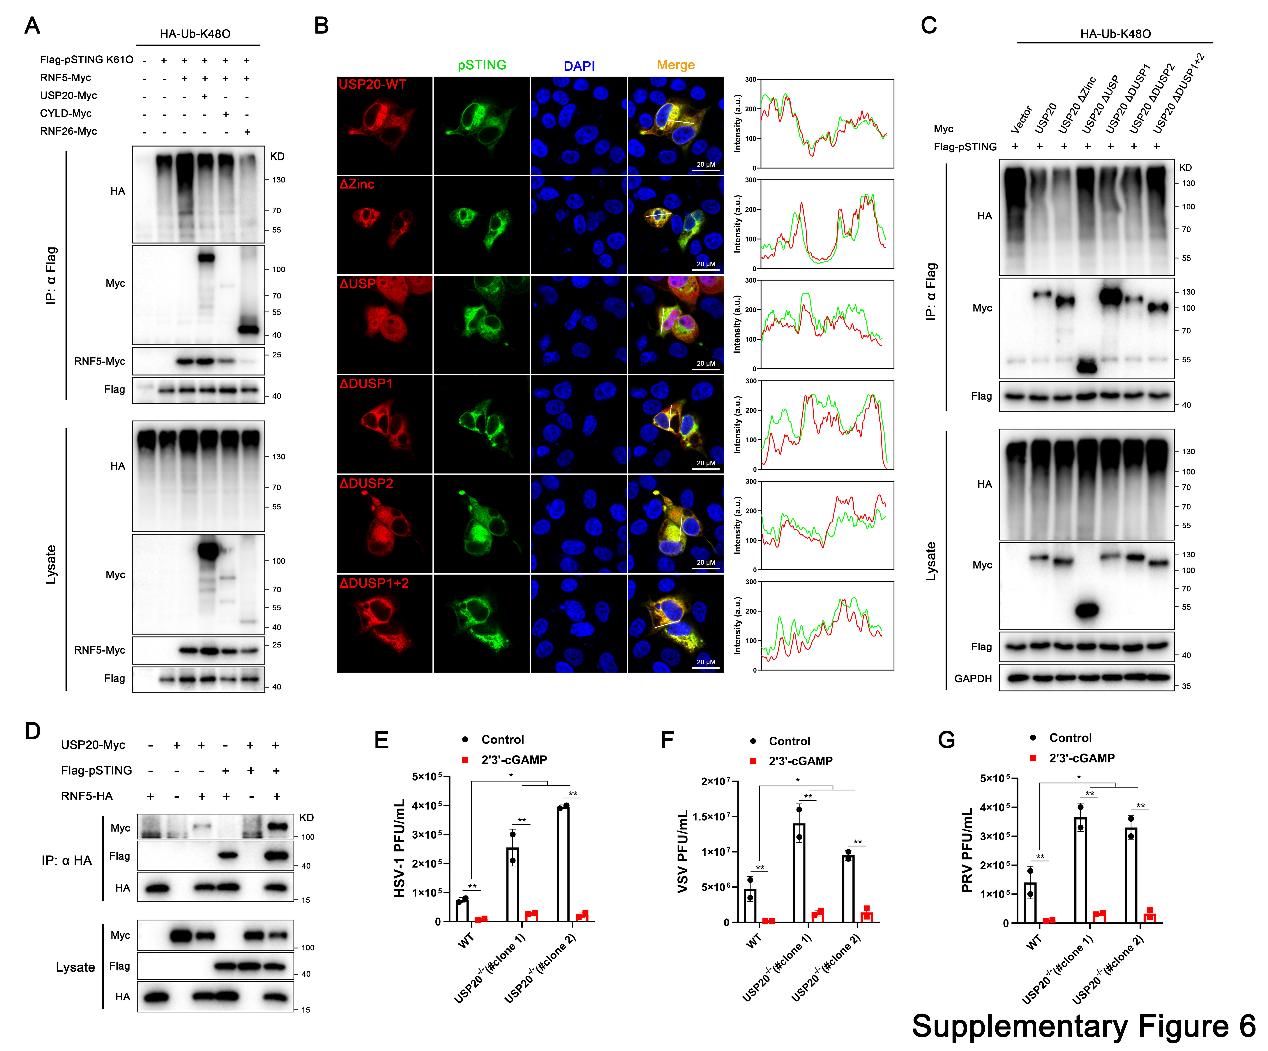


**Figure S6**. **USP20 positively regulates pSTING-mediated antiviral response (correlated with Figure 8 and Figure 9).**

**(A)** Western blotting was used to determine the effects of USP20, CYLD, and RNF26 on the level of RNF5-assembled K48-linked ubiquitin chains on pSTING at K61. **(B)** The colocalization of USP20 truncations with pSTING was observed by confocal microscopy. **(C)** The effects of each USP20 truncation mutants on the level of K48-linked ubiquitination of STING were also determined. **(D)** The Co-immunoprecipitation analysis of mutual interactions between pSTING, RNF5 and USP20 in transfected 293T cells. RNF5 was immunoprecipitated with an anti-HA antibody, and the interactions between Flag-STING, RNF5-HA, and USP20-Myc were detected by Western blotting. **(E-G)** Quantification of the plaque assay results from Figures 9E (E), 9G (F), and 9H (G). **p* < 0.05 and ***p* < 0.01.


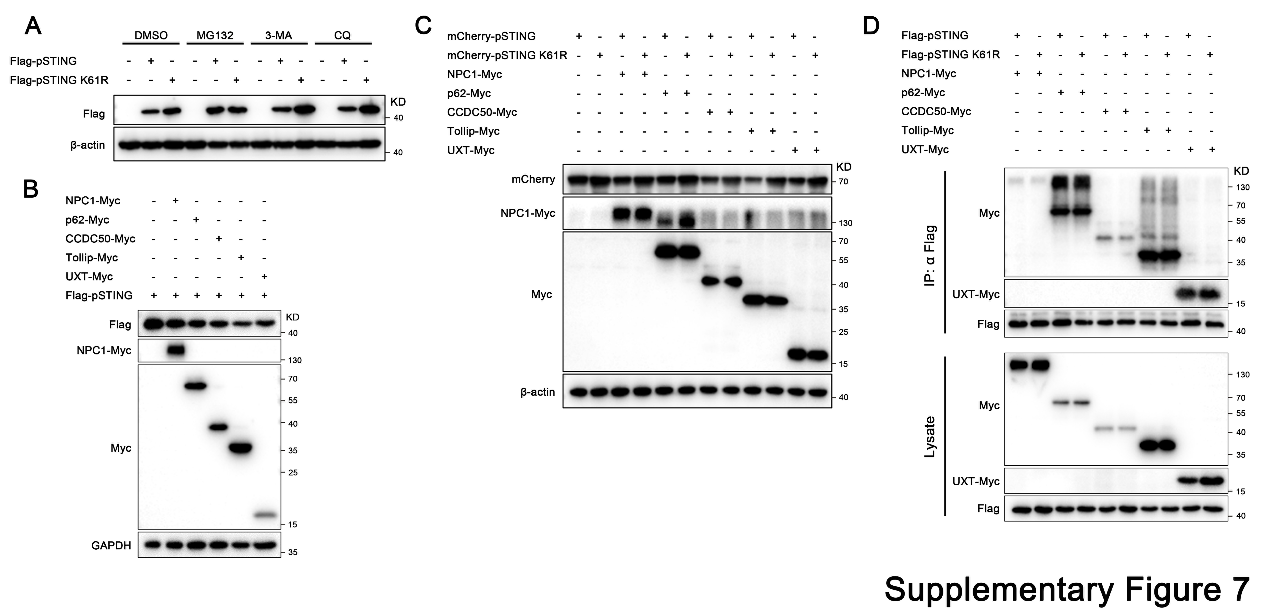


**Figure S7. Ubiquitination at the K61 is not involved in pSTING degradation mediated by selective autophagy.**

**(A)** Western blot analysis of the differential effects of MG132 (10 μM), 3-MA (50 μM) and CQ (10 μM) on the expressions of Flag-tagged STING and its K61R mutant in transfected HEK293T cells. **(B** and **C)** Western blot analysis of the effects of various autophagy receptors on the expressions of Flag-tagged STING (B) and mCherry-tagged STING or its K61R mutant (C) in HEK293T cells. **(D)** HEK293T cells were co-transfected withFlag-pSTING or its K61R mutant, together with NPC1-Myc, p62-Myc, CCDC50-Myc, Tollip-Myc or UXT-Myc (each 0.5 μg) for 24 h. After cell collection, STING was immunoprecipitated, and Western blotting was used to detect differences of the interactions between STING or its K61R mutant and various autophagy receptors.
