# Supplementary material
Source: Research Square preprint supplement (doi:10.21203/rs.3.rs-8280286/v1)
Supplement: Supplementary file 2 [file ca5068e4876bb001894925fd.doc]

**Supplementary Table 1. PCR Primers for porcine gene** mutation and cloning

| **Primers** | **Sequence (5’-3’)** |
| --- | --- |
| **pSTING K61R-F**  **pSTING K61R-R**  **pSTING K112R-F**  **pSTING K112R-R**  **pSTING K150R-F**  **pSTING K150R-R**  **pSTING K187R-F**  **pSTING K187R-R**  **pSTING K236R-F**  **pSTING K236R-R**  **pSTING K289R-F**  **pSTING K289R-R**  **Flag-moSTING-F**  **Flag-moSTING-R**  **moSTING K61R-F**  **moSTING K61R-R**  **Flag-mSTING-F**  **Flag-mSTING-R**  **mSTING K61R-F**  **mSTING K61R-R**  **Flag-bSTING-F**  **Flag-bSTING-R**  **bSTING K61R-F**  **bSTING K61R-R**  **Flag-chSTING-F**  **Flag-chSTING-R**  **chSTING K67R-F**  **chSTING K67R-R**  **pRNF5-2HA-F**  **pRNF5-2HA-R**  **pRNF5-myc-F**  **pRNF5-myc-R**  **pTRIM13-myc-F**  **pTRIM13-myc-R**  **pTRIM29-myc-F**  **pTRIM29-myc-R**  **pRNF90-Myc-F**  **pRNF90-Myc-R**  **pRNF26-myc-F**  **pRNF26-myc-R**  **pmCherry-C1-pRNF5-F**  **pmCherry-C1-pRNF5-R**  **pm****Cherry-pRNF5 1-158-R**  **pmCherry-pRNF5 1-118-R**  **pmCherry-pRNF5 1-68-R**  **pmCherry-pRNF5 69-180-F**  **hUSP20-Myc-F**  **hUSP20-Myc-R**  **pUSP20-myc-F**  **pUSP20-myc-R**  **pUSP35-myc-F**  **pUSP35-myc-R**  **pUSP44-myc-F**  **pUSP44-myc-R**  **pUSP49-myc-F**  **sUSP49-myc-R1**  **pUSP49-myc-R2**  **pCYLD-myc-F**  **pCYLD-myc-R**  **pOTUD5-myc-F**  **pOTUD5-myc-R**  **pEIF3F-myc-F**  **pEIF3F-myc-R**  **USP20 Δ1-111-Myc-F**  **USP20 Δ145-685-Myc-F**  **USP20 Δ145-685-Myc-R**  **USP20 Δ687-780-Myc-F**  **USP20 Δ687-780-Myc-R**  **USP20 Δ789-914-Myc-R**  **USP20 Δ687-914-Myc-R**  **pSQSTM1-Myc-F**  **pSQSTM1-Myc-R**  **pCCDC50-Myc-F**  **pCCDC50-Myc-R**  **pNPC1-Myc-F**  **pNPC1-Myc-R**  **pUXT-Myc-F**  **pUXT-Myc-R**  **pTollip-Myc-F**  **pTollip-Myc-R**  **pCold-GST-pSTING-F**  **pCold-GST-pSTING-R**  **pET32a-pUBA1-F**  **pET32a-pUBA1-R**  **pET32a-pUBE2D1-F**  **pET32a-pUBE2D1-R**  **pET32a-pRNF5-F**  **pET32a-pRNF5-R**  **pET32a-****Ub4-K48-F1**  **pET32a-Ub4-K48-R1**  **pET32a-Ub4-K48-F2**  **pET32a-Ub4-K48-R2**  **pET32a-Ub4-K48-F3**  **pET32a-Ub4-K48-R3** | GCAGAGCCCCCTCACCAGCAGTCCTATCTG  CAGATAGGACTGCTGGTGAGGGGGCTCTGC  CAGGCCAGCCCTGTCTCGGATGGAGAAGTA  TACTTCTCCATCCGAGACAGGGCTGGCCTG  CCACGTTGAAGTTCCTTCTTTCACAGATTGCAGAGAC  GTCTCTGCAATCTGTGAAAGAAGGAACTTCAACGTGG  CCCCCGAGTACGTTCCTGTGGCGCTGATTAT  ATAATCAGCGCCACAGGAACGTACTCGGGGG  CCCGGCCCCTGATGCCAGCACGGT  ACCGTGCTGGCATCAGGGGCCGGG  CGGCAGAAGAGTCTGGCCTGCTCGAGC  GCTCGAGCAGGCCAGACTCTTCTGCCG  AAGCTTGCGGCCGCGAATTCAATGACCCGCTCCAGTCTGCAT  CCGGGATCCTCTAGAGTCGACTCAGGAGAAATCCGTGCGGAG  CAGCTGGGACAGCTGTTAAGAGGGGTCTGC  GCAGACCCCTCTTAACAGCTGTCCCAGCTG  AAGCTTGCGGCCGCGAATTCAATGCCATACTCCAACCTGCAT  CCGGGATCCTCTAGAGTCGACTCAGATGAGGTCAGTGCGGAG  ACTTGGACTACTGTTGAGAAACCTCTGCTGTCTGG  CCAGACAGCAGAGGTTTCTCAACAGTAGTCCAAGT  AAGCTTGCGGCCGCGAATTCAATGCCTCACTCCAGCCTGCAT  CCGGGATCCTCTAGAGTCGACTCAGAAGACATCCGAGCGGAG  CAGATGGGACTGCTGATCAGGGGAATCTGCAGTC  GACTGCAGATTCCCCTGATCAGCAGTCCCATCTG  AAGCTTGCGGCCGCGAATTCAATGCCCCAGGACCCGTCAACC  CCGGGATCCTCTAGAGTCGACTCAGGGGCAGTCACTGCGCAG  GCTCGGGGTGCTGCTCAGGGGCTGCTG  CAGCAGCCCCTGAGCAGCACCCCGAGC  TCTCATCATTTTGGCAAAGAATTCATGGCAGCAGCGGAGGAG  ATCGTATGGGTAGCTGGTGATATCAATACTGAGCAGCCAGAA  TCTCATCATTTTGGCAAAGAATTCATGGCAGCAGCGGAGGAG  GATGAGTTTCTGCTCGATATCAATACTGAGCAGCCAGAAAAA  CATCATTTTGGCAAAGAATTCATGGAGCTGCTGGAAGAAGAT  GATGAGTTTCTGCTCGATATCTAATAGTTTATATTTGCACAC  TCTCATCATTTTGGCAAAGAATTCATGGAAGCCGCAGACGCC  GATGAGTTTCTGCTCGATATCTGGGGCCTCGTTGGACCCAAT  CATCATTTTGGCAAAGAATTCATGGCGGCGGTGGGGCCGCGG  GATGAGTTTCTGCTCGATATCAGGCCAGATTCGCAAATAGGT  CATCATTTTGGCAAAGAATTCATGGAGGCTGTGTATCTAGTA  GATGAGTTTCTGCTCGATATCGAGGTAGACATTGAGGGTCTG  TACAAGTCCGGACTCAGATCTATGGCAGCAGCGGAGGAGGAG  GTACCGTCGACTGCAGAATTCTCAAATACTGAGCAGCCAGAA  GTACCGTCGACTGCAGAATTCTCAGGCCGGGTGACCCTGTCC  GTACCGTCGACTGCAGAATTCTCACCCAGTGTCGCCAAATGG  GTACCGTCGACTGCAGAATTCTCATTTACACACTGGGCACTC  TACAAGTCCGGACTCAGATCTGCTGGGATCAGCAGAGAAAAG  CATCATTTTGGCAAAGAATTCATGGGGGACTCCAGGGACCTT  GATGAGTTTCTGCTCGATATCCACGGCCCGCGTCTCGGCTTC  CATCATTTTGGCAAAGAATTCATGGGGGACTCCAGGGACCCT  GATGAGTTTCTGCTCGATATCCACGGCCCGCGTCTCAGCTTC  CATCATTTTGGCAAAGAATTCATGGACAAGATCCTGGAGGCG  GATGAGTTTCTGCTCGATATCGAAGACGAGTCTGTGGAAGTC  CATCATTTTGGCAAAGAATTCATGCTAACGATGGATAAGTGC  GATGAGTTTCTGCTCGATATCGCTAAGGATTTCATTAGAAGA  CATCATTTTGGCAAAGAATTCATGGATAGATGCAAACATGTA  GATGAGTTTCTGCTCGATATCGCTTTGAGTCATTGCAGTGGA  GATGAGTTTCTGCTCGATATCGGGGAAGGTCCGTGGTCTGCC  CATCATTTTGGCAAAGAATTCATGAGTTCGGGCTTATGGAGC  GATGAGTTTCTGCTCGATATCTTTGTACAGACTCATTGTTGG  CATCATTTTGGCAAAGAATTCATGACTATTCTCCCCAAAAAG  GATGAGTTTCTGCTCGATATCACTCTTGTCTGGGGGTGGGTC  CATCATTTTGGCAAAGAATTCATGGCAGCACCGGCAGTACCG  GATGAGTTTCTGCTCGATATCCAGGTTCACCAGCTTCTCGTT  CATCATTTTGGCAAAGAATTCATGTCCCCGCCACCCTCCCAC  AAACCTCGAGGCCTCACGAGCGAGGAGGCCATGCGG  CCGCATGGCCTCCTCGCTCGTGAGGCCTCGAGGTTT  TTCTACAGGAAGAGCAGCTCCATCTGCCAGGTGGAG  CTCCACCTGGCAGATGGAGCTGCTCTTCCTGTAGAA  GATGAGTTTCTGCTCGATATCCTCGATCTCCACCTGGCAGAT  GATGAGTTTCTGCTCGATATCGCTGCTCTTCCTGTAGAAGAG  CATCATTTTGGCAAAGAATTCATGGCGTCGCTCACCGTGAAG  GATGAGTTTCTGCTCGATATCCAAGGGCGGTGGGTGTTTCGA  CATCATTTTGGCAAAGAATTCATGTCTGAAGTCAGCATCGAC  GATGAGTTTCTGCTCGATATCTGGCTTATAATGGAAACCTTT  CATCATTTTGGCAAAGAATTCATGAGCGCGCGCGGCCCGGCC  GATGAGTTTCTGCTCGATATCGAAATTGAGGAGCTGTTCTCG  CATCATTTTGGCAAAGAATTCATGGCGACGCCCCCTAAACGG  GATGAGTTTCTGCTCGATATCGTGGCGAGGCTCGGGGAAATT  CATCATTTTGGCAAAGAATTCATGGCGACCACCGTCAGCACG  GATGAGTTTCTGCTCGATATCGGACTCCTCGCCCATCTGGAG  ATGGAGCTCGGTACCCTCGAGATGCCCTACTCCAGCCTGCAT  CAGGTCGACAAGCTTGAATTCtcaGAAGATATCTGAGCGGAG  GCTGATATCGGATCCGAATTCATGTCCAGCTCGCCGCTGTCC  GTGGTGGTGGTGGTGCTCGAGGCGGATGGTGTATCGTACATA  GCTGATATCGGATCCGAATTCATGGCGCTGAAGCGGATTCAG  GTGGTGGTGGTGGTGCTCGAGCATTGCATATTTCTGAGTCCA  GCTGATATCGGATCCGAATTCATGGCAGCAGCGGAGGAGGAG  GTGGTGGTGGTGGTGCTCGAGAATACTGAGCAGCCAGAAAAA  GCTGATATCGGATCCGAATTCATGCAGATCTTCGTGAGGACC  GGTCCTCACGAAGATCTGCATTTTCCCACCTCTGAGACGGAG  CTCCGTCTCAGAGGTGGGAAAATGCAGATCTTCGTGAGGACC  GGTCCTCACGAAGATCTGCATCTTCCCACCTCTGAGACGGAG  CTCCGTCTCAGAGGTGGGAAGATGCAGATCTTCGTGAGGACC  GTGGTGGTGGTGGTGCTCGAGTCACCCACCTCTGAGACGGAG |

**Supplementary Table 2. CRISPR gRNA and Detection Primers for Homozygous KO 3D4/21 Cell Clones**

| **Primers** | **Sequence (5’-3’)** |
| --- | --- |
| **moSTING gRNA1-F**  **moSTING gRNA1-R**  **moSTING gRNA2-F**  **moSTING gRNA2-R**  **pRNF5 gRNA1-F**  **pRNF5 gRNA1-R**  **pRNF5 gRNA2-F**  **pRNF5 gRNA2-R**  **pUSP20 gRNA1-F**  **pUSP20 gRNA1-R**  **pUSP20 gRNA2-F**  **pUSP20 gRNA2-R**  **moSTING detection primer-F**  **moSTING detection primer-R**  **pRNF5 detection primer-F**  **pRNF5 detection primer-R**  **pUSP20 detection primer-F**  **pUSP20 detection primer-R** | CACCGTGGATGGATGCAGACTGGAG  AAACCTCCAGTCTGCATCCATCCAC  CACCGCCATCCATCCCGTGTCCCAG  AAACCTGGGACACGGGATGGATGGC  CACCGCTCGCGGTTTGGCCCTTCG  AAACCGAAGGGCCAAACCGCGAGC  CACCGCAGACATATATTACATTCGA  AAACTCGAATGTAATATATGTCTGC  CACCGCCCCTATAGAGTCAAGATGA  AAACTCATCTTGACTCTATAGGGGC  CACCGTATAGGGGAGGTGACCAAAG  AAACCTTTGGTCACCTCCCCTATAC  TCGCAGAGACAGGAGCTTTG  GGCTGCAGACCCCATTTAAC  CAGGAGGCGGTTTCTCGTTTGT  GAGAATGTGCCCTCTGATCATC  CGGCTGATATGTGGCAGAGCTG  CAAAAGCCAGGCAGAGTCTGCC |

**Supplementary Table 3. Primers used for qPCR in this study**

| **Primers** | **Sequences (5’-3’)** |
| --- | --- |
| **Porcine IFN-β-F** | TGAGCATTCTGCAGTACCTGA |
| **Porcine IFN-β-R** | CCGGAGGTAATCTGTAAGTCTGT |
| **Porcine ISG15-F** | ATCCTGGTGAGGAACGACAA |
| **Porcine ISG15-R** | GAAAGTCAGCCAGAACTGGTC |
| **Porcine ISG56-F** | ATGGGAGTTGGTCATTCAAGA |
| **Porcine ISG56-R** | CAGGTGTTTCACATAGGCCA |
| **Porcine CXCL10-F** | CCCACATGTTGAGATCATTGC |
| **Porcine CXCL10-R** | CATCCTTATCAGTAGTGCCG |
| **Porcine TNF-α-F** | ATCGCCGTCTCCTACCAGA |
| **Porcine TNF-α-R** | TCGATCATCCTTCTCCAGCT |
| **Porcine β-actin-F** | ATGAAGATCAAGATCATCGCG |
| **Porcine β-actin-R** | TCGTACTCCTGCTTGCTGATC |
| **Human IFN-β-F** | TGGGAGGATTCTGCATTACC |
| **Human IFN-β-R** | CAGCATCTGCTGGTTGAAGA |
| **Human ISG56-F** | CGCTATAGAATGGAGTGTCCA |
| **Human ISG56-R** | TTTCCTCCACACTTCAGCA |
| **Human CXCL10-F** | GGTGAGAAGAGATGTCTGAATCC |
| **Human CXCL10-R** | GTCCATCCTTGGAAGCACTGCA |
| **Human IL-6-F** | TGCGTCCGTAGTTTCCTTCT |
| **Human IL-6-R** | GCCTCAGACATCTCCAGTCC |
| **Human TNF-α-F** | TGGCCCAGGCAGTCAGA |
| **Human TNF-α-R** | GGTTTGCTACAACATGGGCTACA |
| **Human RPL32-F** | CAACATTGGTTATGGAAGCAACA |
| **Human RPL32-R** | TGACGTTGTGGACCAGGAACT |
| **HSV-1 gD-F** | ACAAGTCTCTGGGGGCCTGTCC |
| **HSV-1 gD-F** | ATCCCGATGCTGTCCACCGTCA |
| **PRV gD-F** | ACCTAATTTGCGTACGGCCTTGCTT |
| **PRV gD-R** | CAGAAACAGCAGCGTCCCGTCTATC |
| **ASFV B646L-F** | TTGGCCCAAGACTTGCTG |
| **ASFV B646L-R** | CCCTACTGGAACATAAGGCTTA |
| **ASFV I267L-F** | TGAAGGTCGTTCCAAGACTCCT |
| **ASFV I267L-R** | CCAGAACTTGAACGATCTCTGTTG |
